# Supplementary material for: Genome-wide identification and expression analysis of the xyloglucan endotransglucosylase/hydrolase gene family in poplar
Source: PubMed Central journal article supplement (PMC8576992; doi:10.1186/s12864-021-08134-8), 2021-11-08

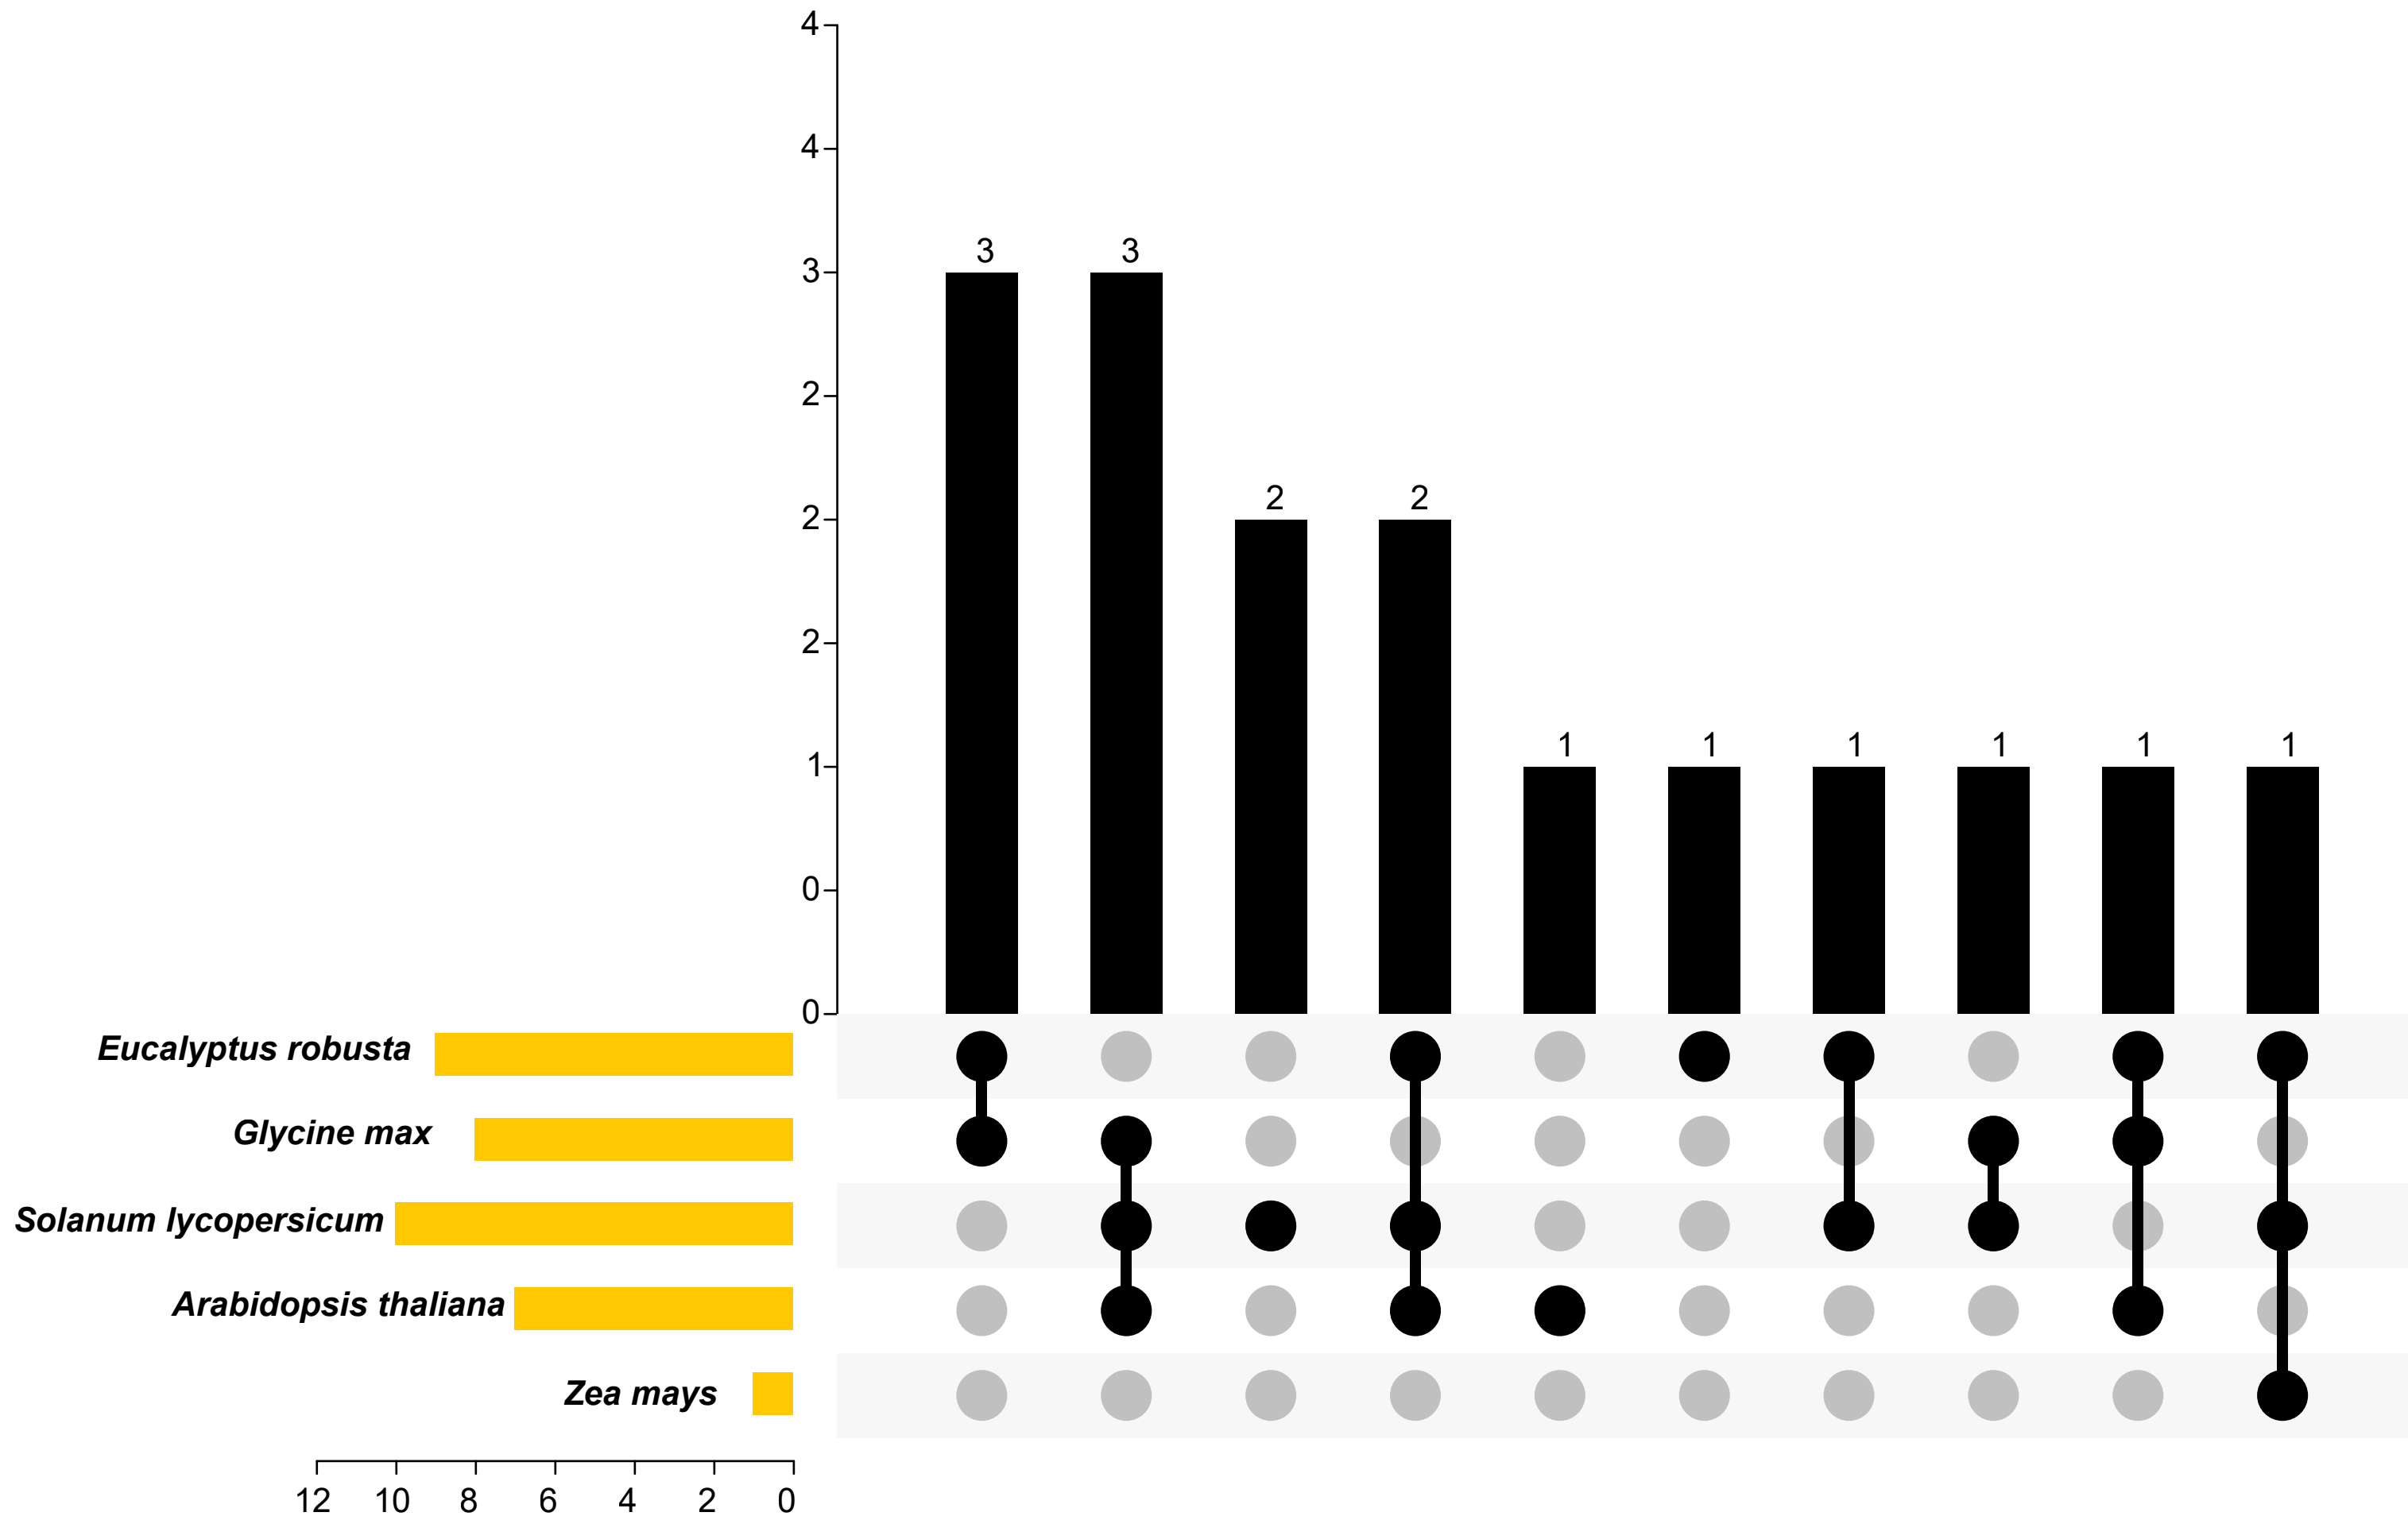

Supplement: 12864_2021_8134_MOESM1_ESM.pdf [file 12864_2021_8134_MOESM1_ESM.pdf]
